# Supplementary material for: Patterns and Life Course Determinants of Black–White Disparities in Biological Age Acceleration: A Decomposition Analysis
Source: PubMed Central journal article supplement — Demography. Author manuscript; Available in PMC 2024 Feb 5. (PMC10842850; doi:10.1215/00703370-11057546), 2023-12-01
Supplement: NIHMS1951229-supplement-Online_Appendix.pdf [file NIHMS1951229-supplement-Online_Appendix.pdf]

## Online Appendix

### Patterns and Life Course Determinants of Black–White Disparities in Biological Age Acceleration: A Decomposition Analysis

Courtney E. Boen, Y. Claire Yang, Allison E. Aiello, Alexis C. Dennis, Kathleen Mullan Harris, Dayoon Kwon, and Daniel W. Belsky

Table A1. Multivariable models of Black-White disparity in KDM biological age acceleration (HRS)

|                              | <b>Model 1</b>        | <b>Model 2</b>       | <b>Model 3</b>           | <b>Model 4</b>         | <b>Model 5</b>              | <b>Model 6</b>            |
|------------------------------|-----------------------|----------------------|--------------------------|------------------------|-----------------------------|---------------------------|
|                              | <i>Basic adjusted</i> | <i>M1 + SES</i>      | <i>M2 +<br/>Race*SES</i> | <i>M1 +<br/>Stress</i> | <i>M4 +<br/>Race*Stress</i> | <i>Fully<br/>adjusted</i> |
|                              | Coeff. (SE)           | Coeff. (SE)          | Coeff. (SE)              | Coeff. (SE)            | Coeff. (SE)                 | Coeff. (SE)               |
| Racial disparity (1=Black)   | 18.893**<br>(6.961)   | 15.171*<br>(6.905)   | 15.282*<br>(6.891)       | 17.576*<br>(6.976)     | 23.930**<br>(7.269)         | 19.401**<br>(7.216)       |
| Age                          | -0.450<br>(0.606)     | -0.108<br>(0.599)    | -0.076<br>(0.599)        | -0.286<br>(0.606)      | -0.257<br>(0.606)           | 0.026<br>(0.600)          |
| Black * Age                  | -0.116<br>(0.102)     | -0.117<br>(0.102)    | -0.109<br>(0.102)        | -0.106<br>(0.102)      | -0.189^<br>(0.106)          | -0.167<br>(0.106)         |
| Sex (1=female)               | 25.797***<br>(5.074)  | 25.424***<br>(5.019) | 25.515***<br>(5.016)     | 25.930***<br>(5.069)   | 25.700***<br>(5.069)        | 25.429***<br>(5.016)      |
| Female * Age                 | -0.474***<br>(0.072)  | -0.477***<br>(0.071) | -0.478***<br>(0.071)     | -0.473***<br>(0.071)   | -0.469***<br>(0.071)        | -0.474***<br>(0.071)      |
| Age <sup>2</sup>             | 0.005<br>(0.004)      | 0.002<br>(0.004)     | 0.002<br>(0.004)         | 0.004<br>(0.004)       | 0.004<br>(0.004)            | 0.001<br>(0.004)          |
| Birth cohort                 | -0.420<br>(1.019)     | -0.713<br>(1.007)    | -0.657<br>(1.006)        | -0.453<br>(1.019)      | -0.471<br>(1.018)           | -0.687<br>(1.005)         |
| Region of birth (1=South)    | 1.770*<br>(0.733)     | 0.747<br>(0.725)     | 0.765<br>(0.725)         | 1.851*<br>(0.733)      | 1.801*<br>(0.732)           | 0.832<br>(0.724)          |
| SES (factor score)           |                       | -4.770***<br>(0.349) | -5.032***<br>(0.374)     |                        |                             | -4.714***<br>(0.381)      |
| Black * SES                  |                       |                      | 1.568<br>(1.022)         |                        |                             | 1.243<br>(1.034)          |
| Stress burden (factor score) |                       |                      |                          | 1.972***<br>(0.365)    | 2.687***<br>(0.413)         | 1.803***<br>(0.414)       |
| Black * Stress burden        |                       |                      |                          |                        | -2.516**<br>(0.851)         | -1.895*<br>(0.853)        |
| Intercept                    | 13.622<br>(27.990)    | 6.790<br>(27.629)    | 5.243<br>(27.602)        | 6.044<br>(27.969)      | 4.555<br>(27.979)           | -0.054<br>(27.626)        |

\*\*\* p<0.001, \*\* p<0.01, \* p<0.05, ^ p<0.1

Notes: Results of OLS regression models with clustered standard errors at the household. n=6,782.

Table A2. Multivariable models of Black-White disparity in homeostatic dysregulation (log) (HRS)

|                              | <b>Model 1</b>        | <b>Model 2</b>       | <b>Model 3</b>           | <b>Model 4</b>         | <b>Model 5</b>              | <b>Model 6</b>            |
|------------------------------|-----------------------|----------------------|--------------------------|------------------------|-----------------------------|---------------------------|
|                              | <i>Basic adjusted</i> | <i>M1 + SES</i>      | <i>M2 +<br/>Race*SES</i> | <i>M1 +<br/>Stress</i> | <i>M4 +<br/>Race*Stress</i> | <i>Fully<br/>adjusted</i> |
|                              | Coeff. (SE)           | Coeff. (SE)          | Coeff. (SE)              | Coeff. (SE)            | Coeff. (SE)                 | Coeff. (SE)               |
| Racial disparity (1=Black)   | 1.106***<br>(0.213)   | 1.005***<br>(0.212)  | 1.009***<br>(0.212)      | 1.068***<br>(0.214)    | 1.296***<br>(0.223)         | 1.173***<br>(0.223)       |
| Age                          | 0.010<br>(0.020)      | 0.019<br>(0.020)     | 0.020<br>(0.020)         | 0.014<br>(0.020)       | 0.015<br>(0.020)            | 0.023<br>(0.020)          |
| Black * Age                  | -0.009**<br>(0.003)   | -0.009**<br>(0.003)  | -0.009**<br>(0.003)      | -0.009**<br>(0.003)    | -0.012***<br>(0.003)        | -0.011***<br>(0.003)      |
| Sex (1=female)               | 0.325*<br>(0.159)     | 0.315*<br>(0.158)    | 0.318*<br>(0.158)        | 0.329*<br>(0.159)      | 0.320*<br>(0.159)           | 0.314*<br>(0.158)         |
| Female * Age                 | -0.007**<br>(0.002)   | -0.007**<br>(0.002)  | -0.007**<br>(0.002)      | -0.007**<br>(0.002)    | -0.007**<br>(0.002)         | -0.007**<br>(0.002)       |
| Age <sup>2</sup>             | 0.000<br>(0.000)      | 0.000<br>(0.000)     | 0.000<br>(0.000)         | 0.000<br>(0.000)       | 0.000<br>(0.000)            | 0.000<br>(0.000)          |
| Birth cohort                 | 0.001<br>(0.034)      | -0.006<br>(0.034)    | -0.004<br>(0.034)        | 0.000<br>(0.034)       | -0.000<br>(0.034)           | -0.005<br>(0.034)         |
| Region of birth (1=South)    | 0.104***<br>(0.024)   | 0.077**<br>(0.024)   | 0.077**<br>(0.024)       | 0.106***<br>(0.024)    | 0.104***<br>(0.024)         | 0.079***<br>(0.024)       |
| SES (factor score)           |                       | -0.127***<br>(0.012) | -0.137***<br>(0.013)     |                        |                             | -0.126***<br>(0.013)      |
| Black * SES                  |                       |                      | 0.057^<br>(0.031)        |                        |                             | 0.046<br>(0.031)          |
| Stress burden (factor score) |                       |                      |                          | 0.056***<br>(0.013)    | 0.082***<br>(0.015)         | 0.058***<br>(0.015)       |
| Black * Stress burden        |                       |                      |                          |                        | -0.090**<br>(0.028)         | -0.073**<br>(0.028)       |
| Intercept                    | 2.606**<br>(0.931)    | 2.417**<br>(0.924)   | 2.360*<br>(0.923)        | 2.390*<br>(0.930)      | 2.336*<br>(0.929)           | 2.196*<br>(0.922)         |

\*\*\* p<0.001, \*\* p<0.01, \* p<0.05, ^ p<0.1

Notes: Results of OLS regression models with clustered standard errors at the household. n=6,782.

Table A3. Multivariable models of Black-White disparity in biological age acceleration by sex (PhenoAge algorithm) (HRS)

|                              | Males (n=2,836) |           |           |          |          |           | Females (n=3,946) |           |           |          |           |           |
|------------------------------|-----------------|-----------|-----------|----------|----------|-----------|-------------------|-----------|-----------|----------|-----------|-----------|
|                              | Model 1         | Model 2   | Model 3   | Model 4  | Model 5  | Model 6   | Model 1           | Model 2   | Model 3   | Model 4  | Model 5   | Model 6   |
| Racial disparity (1=Black)   | 9.035*          | 8.263*    | 8.069*    | 8.481*   | 10.757** | 9.247*    | 8.476**           | 6.773*    | 6.796*    | 8.069**  | 10.705*** | 8.713**   |
|                              | (3.782)         | (3.796)   | (3.776)   | (3.790)  | (4.037)  | (4.043)   | (2.832)           | (2.800)   | (2.792)   | (2.841)  | (2.961)   | (2.931)   |
| Age                          | 0.099           | 0.219     | 0.247     | 0.155    | 0.173    | 0.285     | -0.076            | 0.043     | 0.046     | -0.024   | -0.010    | 0.081     |
|                              | (0.317)         | (0.315)   | (0.315)   | (0.316)  | (0.316)  | (0.314)   | (0.248)           | (0.246)   | (0.245)   | (0.247)  | (0.247)   | (0.245)   |
| Black * Age                  | -0.094^         | -0.101^   | -0.087    | -0.089   | -0.118*  | -0.103^   | -0.077^           | -0.073^   | -0.072^   | -0.075^  | -0.110*   | -0.099*   |
|                              | (0.056)         | (0.056)   | (0.056)   | (0.056)  | (0.059)  | (0.059)   | (0.041)           | (0.041)   | (0.041)   | (0.041)  | (0.043)   | (0.043)   |
| Age <sup>2</sup>             | 0.000           | -0.001    | -0.001    | -0.000   | -0.000   | -0.001    | 0.001             | -0.000    | -0.000    | 0.001    | 0.000     | -0.000    |
|                              | (0.002)         | (0.002)   | (0.002)   | (0.002)  | (0.002)  | (0.002)   | (0.001)           | (0.001)   | (0.001)   | (0.001)  | (0.001)   | (0.001)   |
| Birth cohort                 | -0.472          | -0.587    | -0.538    | -0.483   | -0.481   | -0.540    | -0.453            | -0.538    | -0.532    | -0.476   | -0.481    | -0.553    |
|                              | (0.502)         | (0.497)   | (0.496)   | (0.502)  | (0.501)  | (0.496)   | (0.435)           | (0.428)   | (0.427)   | (0.435)  | (0.435)   | (0.428)   |
| Region of birth (1=South)    | 1.169**         | 0.911*    | 0.952*    | 1.205**  | 1.193**  | 0.979**   | 0.574^            | 0.138     | 0.138     | 0.600*   | 0.572^    | 0.156     |
|                              | (0.377)         | (0.370)   | (0.370)   | (0.377)  | (0.377)  | (0.369)   | (0.300)           | (0.297)   | (0.297)   | (0.299)  | (0.299)   | (0.296)   |
| SES (factor score)           |                 | -1.412*** | -1.653*** |          |          | -1.562*** |                   | -1.837*** | -1.862*** |          |           | -1.732*** |
|                              |                 | (0.177)   | (0.188)   |          |          | (0.192)   |                   | (0.146)   | (0.156)   |          |           | (0.160)   |
| Black * SES                  |                 |           | 1.739**   |          |          | 1.646**   |                   |           | 0.135     |          |           | -0.008    |
|                              |                 |           | (0.544)   |          |          | (0.553)   |                   |           | (0.422)   |          |           | (0.427)   |
| Stress burden (factor score) |                 |           |           | 0.586**  | 0.789*** | 0.494*    |                   |           |           | 0.733*** | 1.072***  | 0.749***  |
|                              |                 |           |           | (0.186)  | (0.195)  | (0.194)   |                   |           |           | (0.159)  | (0.179)   | (0.182)   |
| Black * Stress burden        |                 |           |           |          | -0.811^  | -0.525    |                   |           |           |          | -1.109**  | -0.890*   |
|                              |                 |           |           |          | (0.480)  | (0.480)   |                   |           |           |          | (0.377)   | (0.381)   |
| Intercept                    | -4.713          | -7.140    | -8.464    | -7.202   | -8.054   | -10.349   | 2.286             | -0.287    | -0.435    | -0.046   | -0.790    | -2.251    |
|                              | (14.364)        | (14.209)  | (14.185)  | (14.313) | (14.335) | (14.176)  | (11.709)          | (11.555)  | (11.545)  | (11.686) | (11.683)  | (11.539)  |

\*\*\* p<0.001, \*\* p<0.01, \* p<0.05, ^ p<0.1

Notes: Results of sex stratified OLS regression models with clustered standard errors at the household. Coefficient estimates and standard errors presented.

Table A4. Sex Stratified Kitagawa-Oaxaca-Blinder Decomposition of Racial Disparities in Biological Age Acceleration

|                                         | Males (n=2,836)       |         |         |                    |         |         |                           |         |         | Females (n=3,946)     |         |          |                     |         |          |                           |         |          |
|-----------------------------------------|-----------------------|---------|---------|--------------------|---------|---------|---------------------------|---------|---------|-----------------------|---------|----------|---------------------|---------|----------|---------------------------|---------|----------|
|                                         | PhenoAge Acceleration |         |         | KDM Biological Age |         |         | Homeostatic Dysregulation |         |         | PhenoAge Acceleration |         |          | KDM Biological Age  |         |          | Homeostatic Dysregulation |         |          |
|                                         | Coeff. (SE)           | p-value | %       | Coeff. (SE)        | p-value | %       | Coeff. (SE)               | p-value | %       | Coeff. (SE)           | p-value | %        | Coeff. (SE)         | p-value | %        | Coeff. (SE)               | p-value | %        |
| <b>Overall</b>                          |                       |         |         |                    |         |         |                           |         |         |                       |         |          |                     |         |          |                           |         |          |
| <i>Black-White disparity in outcome</i> | 2.355<br>(0.472)      | ***     |         | 12.572<br>(1.632)  | ***     |         | 0.406<br>(0.043)          | ***     |         | 3.048<br>(0.349)      | ***     |          | 11.584<br>(1.003)   | ***     |          | 0.432<br>(0.034)          | ***     |          |
| <i>Endowments</i>                       | 1.37999<br>(0.284)    | ***     | 58.61%  | 6.128<br>(0.927)   | ***     | 48.74%  | 0.061<br>(0.030)          | *       | 15.04%  | 1.458<br>(0.201)      | ***     | 47.84%   | 5.341<br>(0.563)    | ***     | 46.11%   | 0.077<br>(0.023)          | **      | 17.82%   |
| <i>Coefficients</i>                     | 3.083<br>(0.829)      | ***     | 130.92% | 11.934<br>(2.783)  | ***     | 94.93%  | 0.529<br>(0.069)          | ***     | 130.44% | 2.138<br>(0.586)      | ***     | 70.13%   | 8.729<br>(1.798)    | ***     | 75.35%   | 0.367<br>(0.055)          | ***     | 84.95%   |
| <i>Interaction</i>                      | -2.1081<br>(0.719)    | **      | -89.53% | -5.490<br>(2.386)  | ***     | -43.67% | -0.184<br>(0.063)         | **      | -45.37% | -0.548<br>(0.541)     |         | -17.97%  | -2.486<br>(1.584)   |         | -21.46%  | -0.012<br>(0.050)         |         | -2.78%   |
| <b>Endowments</b>                       |                       |         |         |                    |         |         |                           |         |         |                       |         |          |                     |         |          |                           |         |          |
| <i>SES</i>                              | 1.461<br>(0.191)      | ***     | 62.03%  | 5.193<br>(0.658)   | ***     | 41.30%  | 0.104<br>(0.019)          | ***     | 25.61%  | 1.419<br>(0.145)      | ***     | 46.56%   | 3.350<br>(0.397)    | ***     | 28.92%   | 0.116<br>(0.015)          | ***     | 26.85%   |
| <i>Stress burden</i>                    | 0.243<br>(0.102)      | *       | 10.31%  | 0.829<br>(0.356)   | *       | 6.59%   | 0.022<br>(0.011)          | *       | 5.42%   | 0.358<br>(0.096)      | ***     | 11.74%   | 0.839<br>(0.259)    | **      | 7.24%    | 0.030<br>(0.010)          | **      | 6.94%    |
| <i>Age</i>                              | -0.318<br>(0.286)     |         | -13.50% | -0.452<br>(1.008)  |         | -3.59%  | -0.096<br>(0.030)         | **      | -23.67% | -0.094<br>(0.270)     |         | -3.08%   | 0.887<br>(0.746)    |         | 7.66%    | -0.107<br>(0.030)         | ***     | -24.77%  |
| <i>Cohort</i>                           | -0.515<br>(0.297)     | ^       | -21.85% | -1.003<br>(1.028)  |         | -7.98%  | -0.023<br>(0.029)         |         | -5.67%  | -0.418<br>(0.281)     |         | -13.71%  | -0.008<br>(0.768)   |         | -0.07%   | 0.010<br>(0.031)          |         | 2.31%    |
| <i>Region of birth (1=South)</i>        | 0.509<br>(0.151)      | **      | 21.62%  | 1.561<br>(0.514)   | **      | 12.42%  | 0.054<br>(0.015)          | ***     | 13.31%  | 0.193<br>(0.126)      |         | 6.33%    | 0.273<br>(0.361)    |         | 2.35%    | 0.028<br>(0.014)          | *       | 6.48%    |
| <b>Coefficients</b>                     |                       |         |         |                    |         |         |                           |         |         |                       |         |          |                     |         |          |                           |         |          |
| <i>SES</i>                              | 0.579<br>(0.210)      | **      | 24.57%  | 1.031<br>(0.705)   |         | 8.20%   | 0.049<br>(0.019)          | *       | 12.08%  | -0.028<br>(-0.105)    |         | -0.92%   | -0.121<br>(0.299)   |         | -1.04%   | -0.002<br>(0.010)         |         | -0.46%   |
| <i>Stress burden</i>                    | -0.001<br>(0.012)     |         | -0.06%  | -0.003<br>(0.032)  |         | -0.03%  | 0.000<br>(0.001)          |         | -0.03%  | 0.112<br>(0.049)      | *       | 3.69%    | 0.305<br>(0.134)    | *       | 2.64%    | 0.010<br>(0.004)          | *       | 2.31%    |
| <i>Age</i>                              | 0.042<br>(15.608)     |         | 1.78%   | 23.177<br>(53.806) |         | 184.35% | 0.444<br>(1.339)          |         | 109.48% | -4.771<br>(11.175)    |         | -156.54% | -17.419<br>(34.010) |         | -150.37% | -0.892<br>(1.064)         |         | -206.48% |
| <i>Cohort</i>                           | 5.944<br>(6.028)      |         | 252.44% | 16.928<br>(20.809) |         | 134.65% | 0.467<br>(0.530)          |         | 115.15% | 0.573<br>(4.419)      |         | 18.79%   | -6.070<br>(13.853)  |         | -52.40%  | -0.058<br>(0.429)         |         | -13.43%  |
| <i>Region of birth (1=South)</i>        | -0.571<br>(0.286)     | *       | -24.24% | -2.503<br>(0.976)  | *       | -19.91% | -0.055<br>(0.026)         | *       | -13.56% | -0.420<br>(0.219)     | ^       | -13.79%  | -1.286<br>(0.648)   | *       | -11.10%  | -0.018<br>(0.021)         |         | -4.17%   |
| <b>Interaction</b>                      |                       |         |         |                    |         |         |                           |         |         |                       |         |          |                     |         |          |                           |         |          |
| <i>SES</i>                              | -1.447<br>(0.523)     | **      | -61.47% | -2.579<br>(1.763)  |         | -20.52% | -0.123<br>(0.048)         | *       | -30.33% | 0.095<br>(0.354)      |         | 3.12%    | 0.407<br>(1.011)    |         | 3.52%    | 0.005<br>(0.033)          |         | 1.16%    |
| <i>Stress burden</i>                    | -0.249<br>(0.210)     |         | -10.58% | -0.624<br>(2.386)  |         | -4.96%  | -0.028<br>(0.020)         |         | -6.90%  | -0.441<br>(0.187)     | *       | -14.47%  | -1.198<br>(0.507)   | *       | -10.34%  | -0.039<br>(0.017)         | *       | -9.03%   |
| <i>Age</i>                              | -0.496<br>(0.898)     |         | -21.05% | -1.332<br>(3.094)  |         | -10.59% | 0.025<br>(0.077)          |         | 6.16%   | 0.299<br>(0.700)      |         | 9.80%    | 1.090<br>(2.130)    |         | 9.41%    | 0.056<br>(0.067)          |         | 12.96%   |
| <i>Cohort</i>                           | 0.862<br>(0.879)      |         | 36.61%  | 2.455<br>(3.028)   |         | 19.53%  | 0.068<br>(0.077)          |         | 16.77%  | 0.092<br>(0.709)      |         | 3.01%    | -0.974<br>(2.223)   |         | -8.41%   | -0.009<br>(0.069)         |         | -2.08%   |
| <i>Region of birth (1=South)</i>        | -0.778<br>(0.392)     | *       | -33.03% | -3.411<br>(1.343)  | *       | -27.13% | -0.075<br>(0.035)         | *       | -18.49% | -0.592<br>(0.309)     | ^       | -19.43%  | -1.812<br>(0.915)   | *       | -15.64%  | -0.025<br>(0.026)         |         | -5.79%   |

\*\*\* p<0.001, \*\* p<0.01, \* p<0.05, ^ p<0.1

Notes: Results of sex stratified three-fold decomposition that decomposes Black-White disparity in biological age measures.
